# Supplementary material for: Safety Assessment of Lactiplantibacillus plantarum TWK10 Based on Whole-Genome Sequencing, Phenotypic, and Oral Toxicity Analysis
Source: MDPI journal article supplement (doi:10.3390/microorganisms10040784), 2022-04-07
Supplement: s1 [file s1]

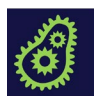

## Supplementary materials

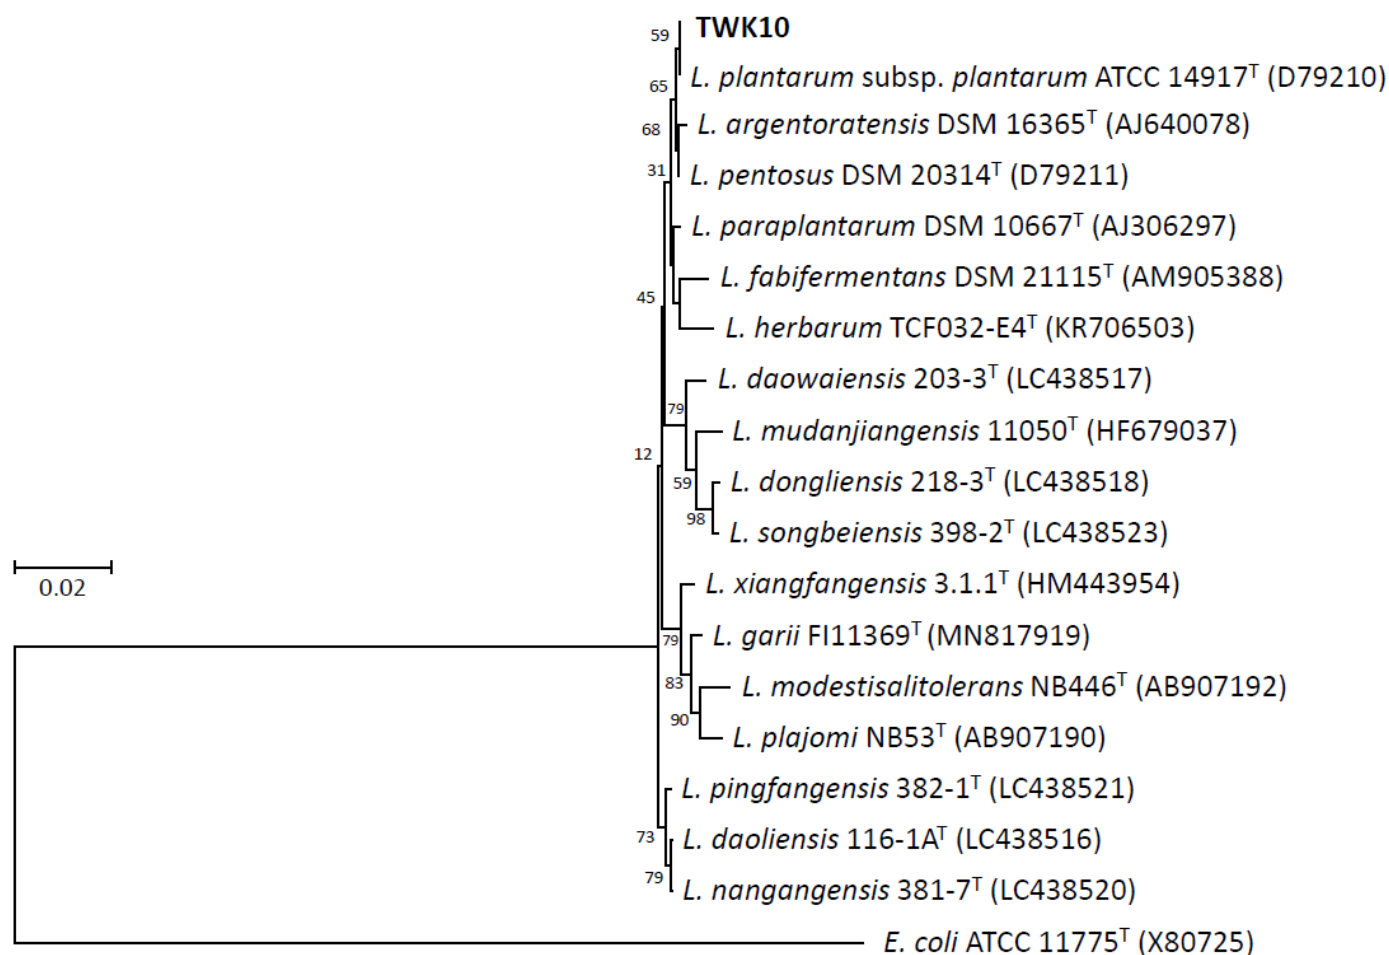

**Figure S1.** Phylogenetic tree based on 16S rRNA gene sequences showing the relationship of strain TWK10 with type strains of closely related species in the genus *Lactiplantibacillus*. The tree was reconstructed by the neighbor-joining method with Kimura's two-parameter model, and *Escherichia coli* ATCC 11775<sup>T</sup> was used as an outgroup. Bootstrap values with 1000 replications are given at nodes. Bar, 2% sequence divergence.

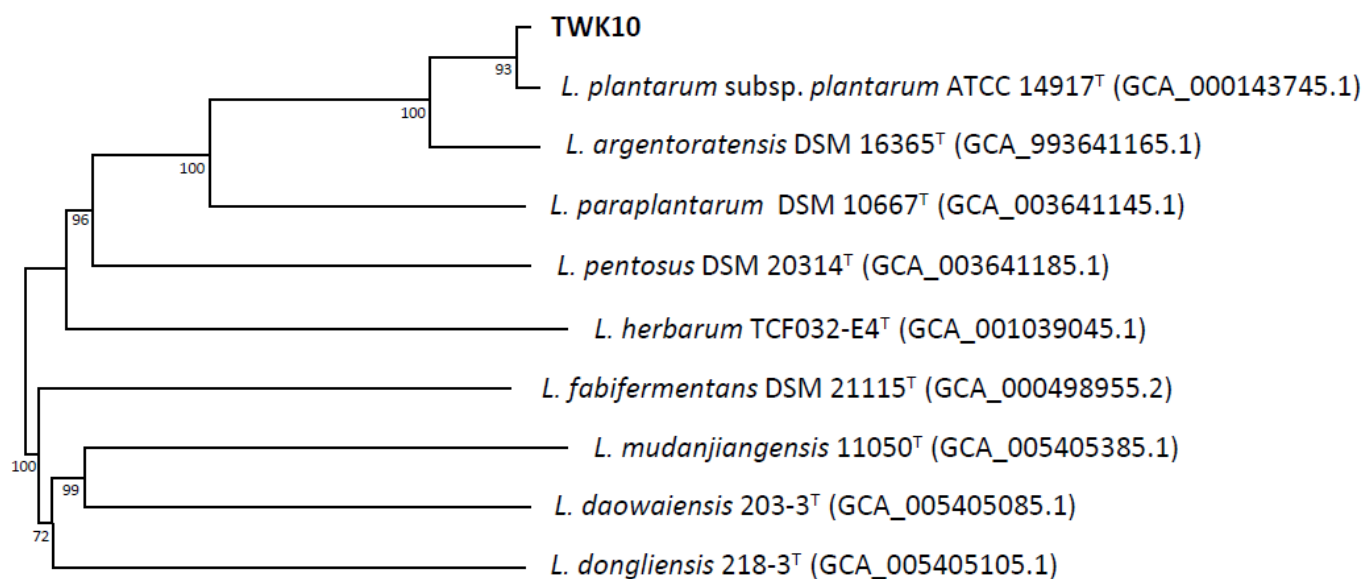

**Figure S2.** The phylogenomic tree based on whole genome sequences of TWK10 and its closely related the type strains in the genus *Lactiplantibacillus*. Tree inferred with FastME 2.1.6.1 from GBDP distances calculated from genome sequences. The branch lengths are scaled in terms of GBDP distance formula  $d_s$ . The numbers above branches are GBDP pseudo-bootstrap support values > 60 % from 100 replications, with an average branch support of 94.3 %.

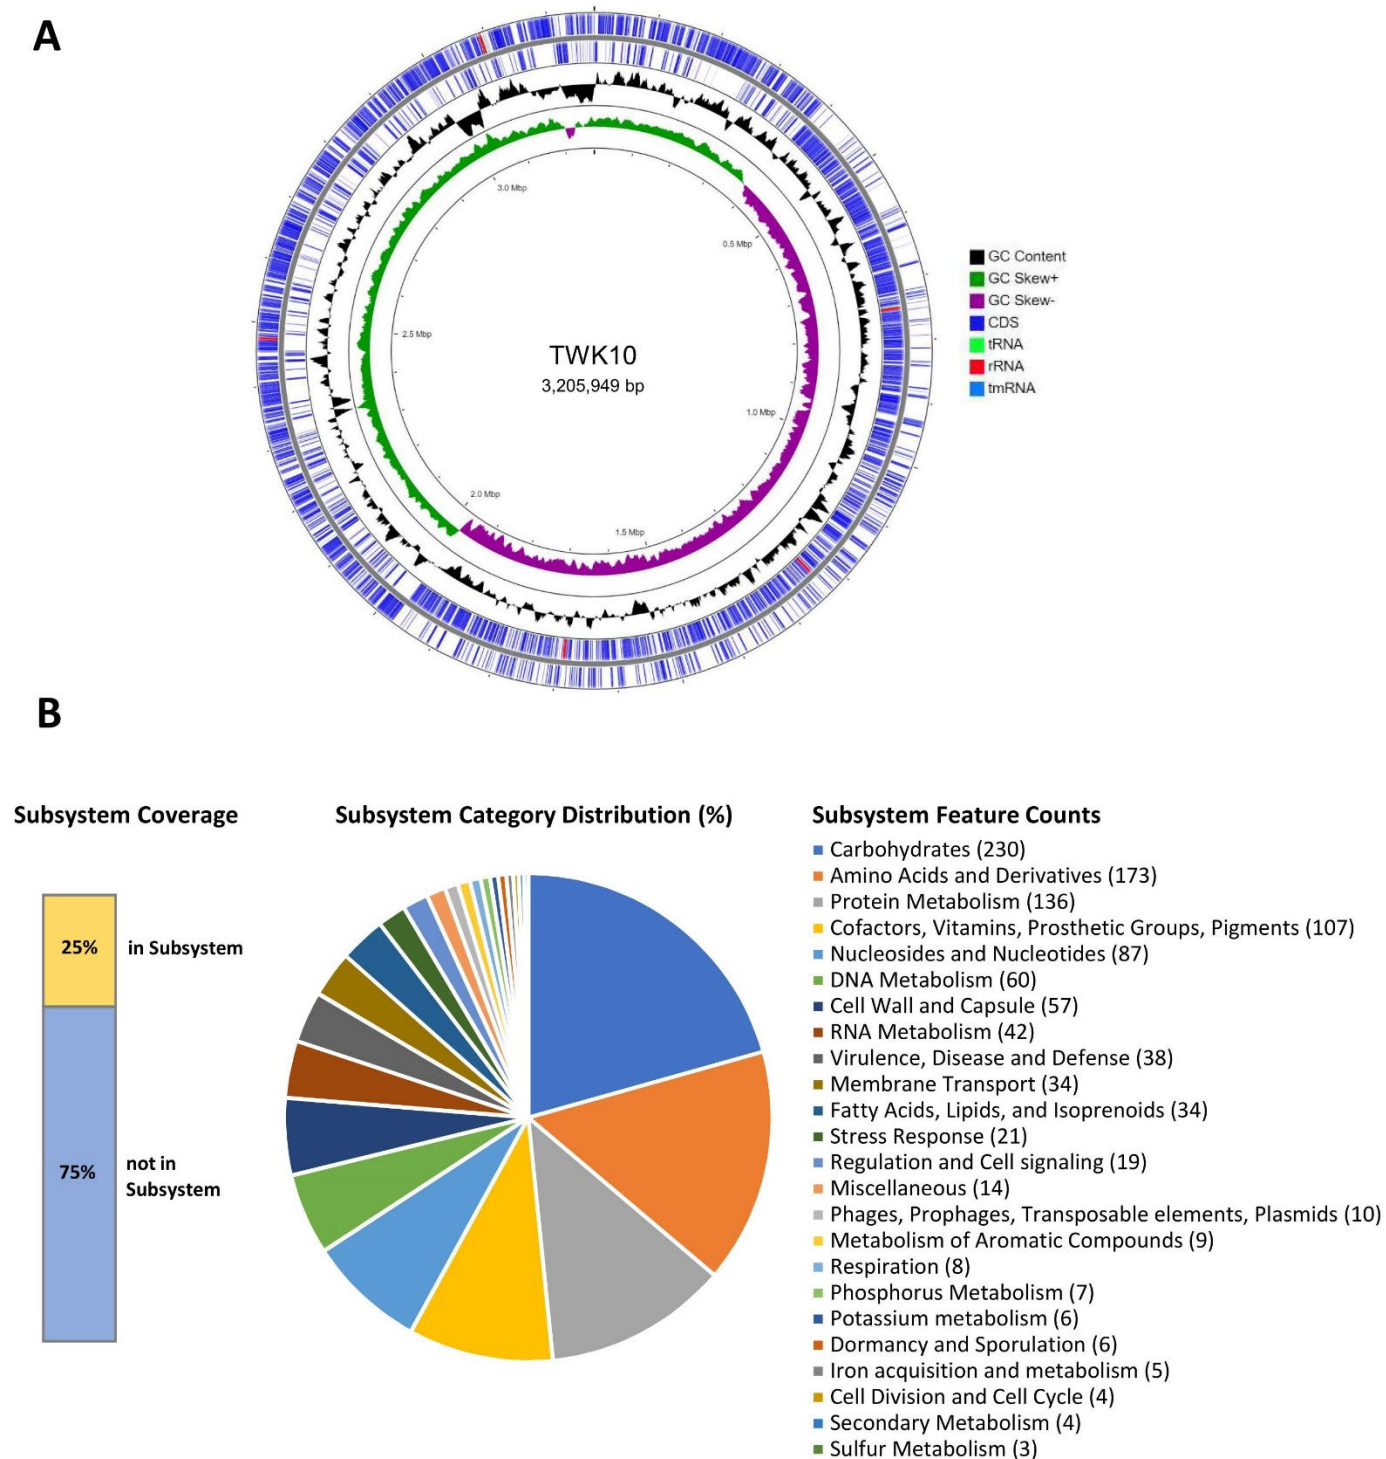

**Figure S3. Genomic features of *Lactiplantibacillus plantarum* TWK10.** (A) The outer two circles show the CDS, tRNA, rRNA, and tmRNA on the forward and reverse strands. The third circle shows the GC content (black). The fourth circle represents the GC skew  $(C - G)/(C + G)$  curve (positive GC skew, green; negative GC skew, violet). (B) The genome of *L. plantarum* TWK10 annotated using the Rapid Annotation System Technology (RAST) server. The orange-colored part (25%) in the bar chart corresponds to the percentage of proteins included. The pie chart demonstrates the percentage distribution of SEED subsystem features. Numerals in parentheses are the counts of genes in each subsystem feature. CDS: coding sequence; tRNA: transfer RNA; rRNA: ribosomal RNA; tmRNA: transfer-messenger RNA.

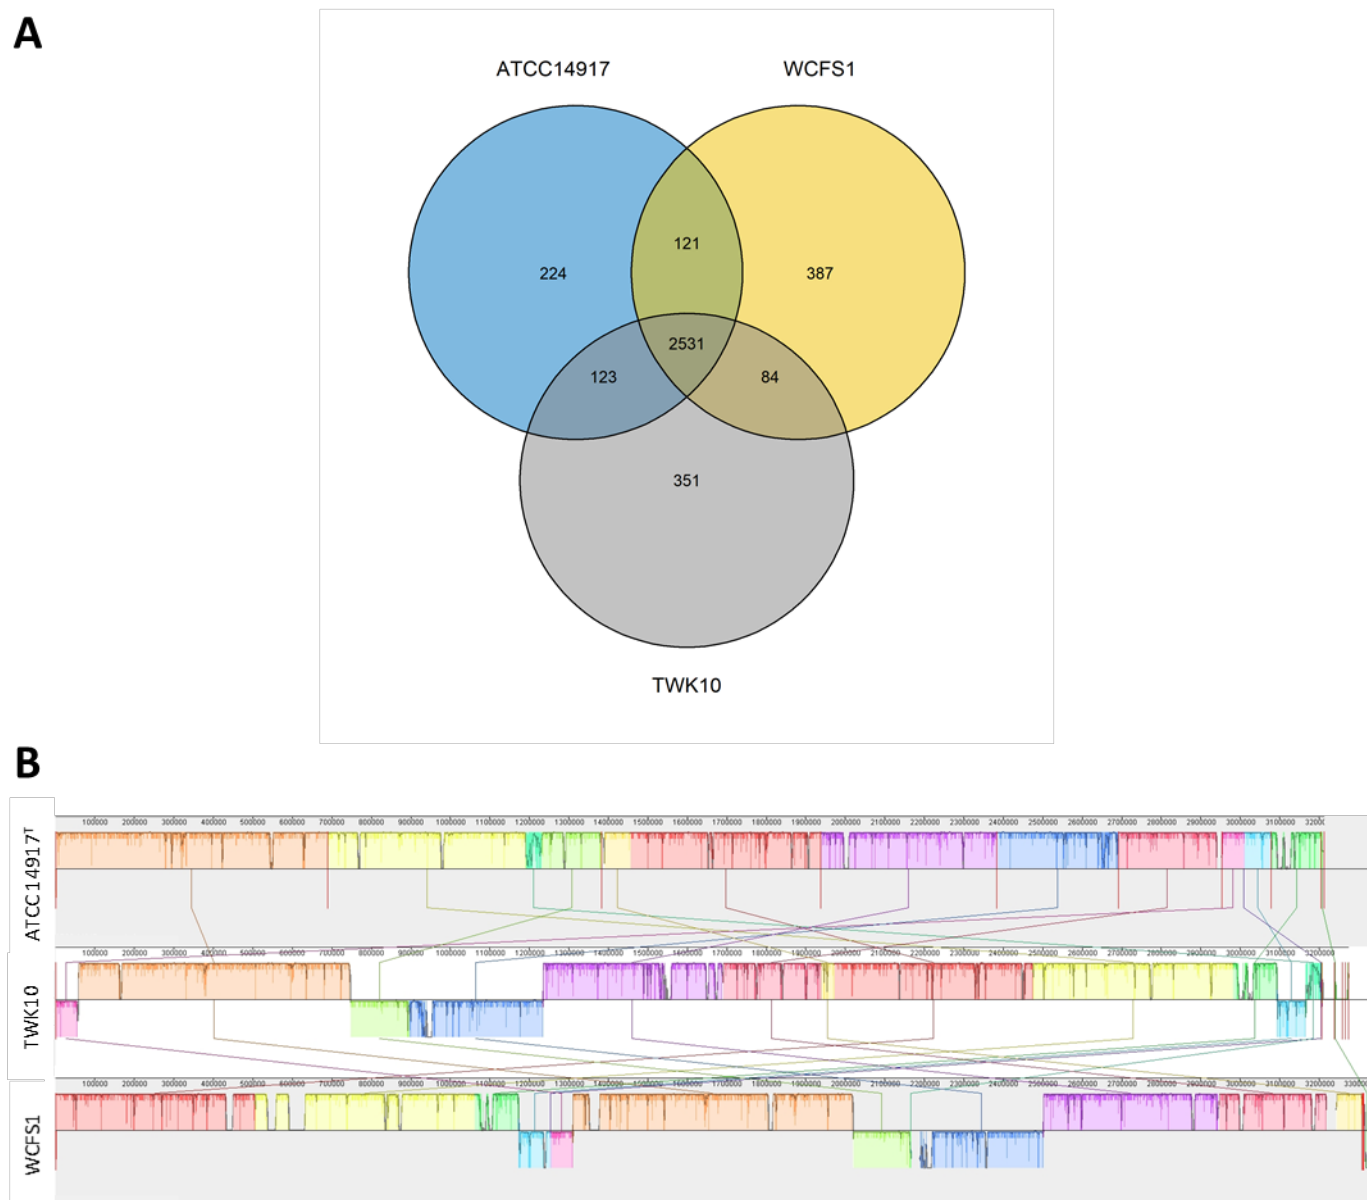

**Figure S4. Genomic comparison of the TWK10 with *L. plantarum* strains, ATCC 14917<sup>T</sup> and WCFS1.** (A) Venn diagram representing the presence/absence of orthologous genes in the TWK10, ATCC 14917<sup>T</sup>, and WCFS1 genomes. (B) Synteny of the *L. plantarum* TWK10 genome with the ATCC 14917<sup>T</sup> and WCFS1 reference genomes obtained using MAUVE. Boxes in same color represent homologous regions (local collinear blocks; LCBs) between *L. plantarum* genomes. Homologous regions are connected by lines. Uncolored regions within the LCBs or in-between LCBs indicate the presence of strain-specific sequences.

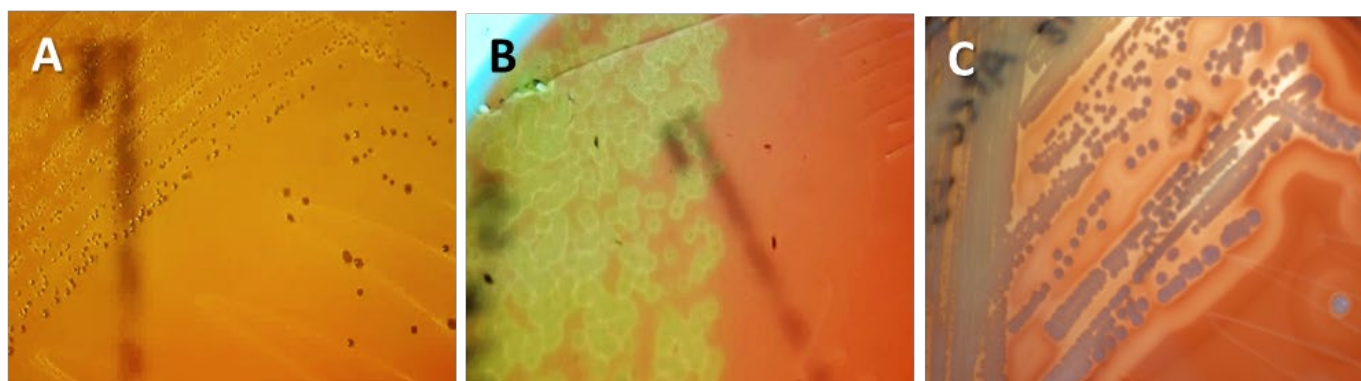

**Figure S5. Hemolytic activity of TWK10.** Hemolytic activity was determined on MRS agar supplemented with 5% (w/v) defibrinated sheep blood at 37 °C under aerobic conditions for 48 h. (A) TWK10. (B)  $\alpha$ -hemolytic positive control strain, *Streptococcus pneumoniae* ATCC 6305. (C)  $\beta$ -hemolytic positive control strain, *Staphylococcus aureus* ATCC 25923.

**Table S1.** Average nucleotide identity (ANI) values and digital DNA–DNA hybridization (dDDH) prediction values between strain TWK10 and genetically closely related species in the genus *Lactiplantibacillus*.

|    | Species                                     | Strain                  | Accession No.   | 1                 | 2      | 3     | 4     | 5     | 6     | 7     | 8     | 9     | 10    |
|----|---------------------------------------------|-------------------------|-----------------|-------------------|--------|-------|-------|-------|-------|-------|-------|-------|-------|
| 1  | <i>L. plantarum</i> subsp. <i>plantarum</i> | TWK10                   |                 | 100               | 99.12* | 95.55 | 86.10 | 79.89 | 77.49 | 75.06 | 74.26 | 74.89 | 75.23 |
| 2  | <i>L. plantarum</i> subsp. <i>plantarum</i> | ATCC 14917 <sup>T</sup> | GCA_000143745.1 | 92.7 <sup>†</sup> | 100    | 95.41 | 85.97 | 79.68 | 77.31 | 74.73 | 74.22 | 74.81 | 75.11 |
| 3  | <i>L. argentoratensis</i>                   | DSM 16365 <sup>T</sup>  | GCA_003641165.1 | 62.9              | 62.9   | 100   | 85.79 | 80.22 | 77.14 | 74.96 | 74.26 | 74.76 | 75.25 |
| 4  | <i>L. paraplantarum</i>                     | DSM 10667 <sup>T</sup>  | GCA_003641145.1 | 31.6              | 31.1   | 31.1  | 100   | 80.06 | 77.68 | 75.16 | 74.22 | 74.97 | 75.19 |
| 5  | <i>L. Pentosus</i>                          | DSM 20314 <sup>T</sup>  | GCA_003641185.1 | 24.4              | 23.8   | 24.7  | 24.2  | 100   | 77.07 | 74.88 | 74.04 | 74.76 | 75.32 |
| 6  | <i>L. herbarum</i>                          | TCF032-E4 <sup>T</sup>  | GCA_001039045.1 | 22.7              | 22.5   | 21.8  | 22.7  | 22.1  | 100   | 74.76 | 74.69 | 74.81 | 75.26 |
| 7  | <i>L. daowaiensis</i>                       | 203-3 <sup>T</sup>      | GCA_005405085.1 | 22.0              | 21.0   | 21.5  | 21.4  | 21.8  | 20.3  | 100   | 79.31 | 78.00 | 76.92 |
| 8  | <i>L. dongliensis</i>                       | 11050 <sup>T</sup>      | GCA_005405105.1 | 21.5              | 21.2   | 21.1  | 21.5  | 21.7  | 20.6  | 22.5  | 100   | 76.97 | 75.85 |
| 9  | <i>L. mudanjiangensis</i>                   | 218-3 <sup>T</sup>      | GCA_005405385.1 | 20.7              | 20.5   | 20.3  | 20.5  | 20.8  | 20.1  | 23.0  | 21.7  | 100   | 76.50 |
| 10 | <i>L. fabifermentans</i>                    | DSM 21115 <sup>T</sup>  | GCA_000498955.1 | 22.2              | 21.8   | 21.8  | 21.6  | 22.0  | 21.3  | 22.5  | 22.4  | 21.5  | 100   |

The values on the upper right are the \*OrthoANI values (%), and the values on the lower left are the dDDH<sup>†</sup> values (%).

**Table S2.** Genes associated with general COG functional categories in TWK10 genome.

| COG | Description                           | TWK10           |      | ATCC 14917 <sup>T</sup> |      | WCFS1           |      |
|-----|---------------------------------------|-----------------|------|-------------------------|------|-----------------|------|
|     |                                       | Number of genes | %    | Number of genes         | %    | Number of genes | %    |
| K   | Transcription                         | 276             | 10.7 | 280                     | 11.3 | 291             | 11.3 |
| L   | Replication, recombination and repair | 240             | 9.3  | 172                     | 7    | 176             | 6.8  |

|       |                                                               |      |      |      |      |      |      |
|-------|---------------------------------------------------------------|------|------|------|------|------|------|
| G     | Carbohydrate transport and metabolism                         | 175  | 6.8  | 191  | 7.7  | 194  | 7.5  |
| J     | Translation, ribosomal structure and biogenesis               | 171  | 6.6  | 172  | 7    | 172  | 6.7  |
| E     | Amino acid transport and metabolism                           | 163  | 6.3  | 161  | 6.5  | 171  | 6.6  |
| M     | Cell wall/membrane/envelope biogenesis                        | 157  | 6.1  | 154  | 6.2  | 151  | 5.8  |
| P     | Inorganic ion transport and metabolism                        | 122  | 4.7  | 121  | 4.9  | 123  | 4.8  |
| F     | Nucleotide transport and metabolism                           | 121  | 4.7  | 122  | 4.9  | 126  | 4.9  |
| C     | Energy production and conversion                              | 107  | 4.1  | 111  | 4.5  | 117  | 4.5  |
| H     | Coenzyme transport and metabolism                             | 85   | 3.3  | 82   | 3.3  | 95   | 3.7  |
| U     | Intracellular trafficking, secretion, and vesicular transport | 63   | 2.4  | 64   | 2.6  | 64   | 2.5  |
| V     | Defense mechanisms                                            | 63   | 2.4  | 60   | 2.4  | 63   | 2.4  |
| T     | Signal transduction mechanisms                                | 58   | 2.2  | 55   | 2.2  | 53   | 2.1  |
| I     | Lipid transport and metabolism                                | 50   | 1.9  | 49   | 2    | 53   | 2.1  |
| O     | Posttranslational modification, protein turnover, chaperones  | 46   | 1.8  | 47   | 1.9  | 46   | 1.8  |
| D     | Cell cycle control, cell division, chromosome partitioning    | 41   | 1.6  | 37   | 1.5  | 40   | 1.5  |
| Q     | Secondary metabolite biosynthesis, transport and catabolism   | 16   | 0.6  | 14   | 0.6  | 18   | 0.7  |
| N     | Cell motility                                                 | 7    | 0.3  | 5    | 0.2  | 4    | 0.2  |
| S     | Function unknown                                              | 621  | 24.1 | 572  | 23.2 | 627  | 24.3 |
| Total |                                                               | 2582 | 100  | 2469 | 100  | 2584 | 100  |

**Table S3.** Comparison of SEED subsystem features of TWK10 and *L. plantarum* reference strains, ATCC 14917<sup>T</sup> and WCFS1.

| Subsystem feature category                         | TWK10 | ATCC 14917 <sup>T</sup> | WCFS1 |
|----------------------------------------------------|-------|-------------------------|-------|
| Carbohydrates                                      | 230   | 230                     | 248   |
| Amino Acids and Derivatives                        | 173   | 169                     | 161   |
| Protein Metabolism                                 | 136   | 118                     | 137   |
| Cofactors, Vitamins, Prosthetic Groups, Pigments   | 107   | 100                     | 103   |
| Nucleosides and Nucleotides                        | 87    | 86                      | 88    |
| DNA Metabolism                                     | 60    | 51                      | 57    |
| Cell Wall and Capsule                              | 57    | 54                      | 77    |
| RNA Metabolism                                     | 42    | 40                      | 38    |
| Virulence, Disease and Defense                     | 38    | 38                      | 36    |
| Membrane Transport                                 | 34    | 34                      | 34    |
| Fatty Acids, Lipids, and Isoprenoids               | 34    | 34                      | 36    |
| Stress Response                                    | 21    | 21                      | 20    |
| Regulation and Cell signaling                      | 19    | 16                      | 20    |
| Miscellaneous                                      | 14    | 14                      | 14    |
| Phages, Prophages, Transposable elements, Plasmids | 10    | 12                      | 10    |
| Metabolism of Aromatic Compounds                   | 9     | 5                       | 9     |
| Respiration                                        | 8     | 16                      | 16    |
| Phosphorus Metabolism                              | 7     | 7                       | 7     |
| Potassium metabolism                               | 6     | 5                       | 5     |
| Dormancy and Sporulation                           | 6     | 6                       | 6     |
| Iron acquisition and metabolism                    | 5     | 5                       | 5     |
| Cell Division and Cell Cycle                       | 4     | 4                       | 4     |
| Secondary Metabolism                               | 4     | 4                       | 4     |
| Sulfur Metabolism                                  | 3     | 3                       | 3     |
| Photosynthesis                                     | 0     | 0                       | 0     |
| Motility and Chemotaxis                            | 0     | 0                       | 0     |
| Nitrogen Metabolism                                | 0     | 0                       | 8     |

Genome sequences of TWK10, ATCC 14917<sup>T</sup> and WCFS1 were uploaded to the SEED Viewer server independently. Functional roles of RAST annotated genes were assigned and grouped in subsystem feature categories.

**Table S4.** Strain-specific SEED subsystem functions that differ between TWK10 and WCFS1.

| Strain | Category                                           | Subcategory                                                       | Subsystem                                                   | Role                                                                |
|--------|----------------------------------------------------|-------------------------------------------------------------------|-------------------------------------------------------------|---------------------------------------------------------------------|
| TWK10  | Amino Acids and Derivatives                        | Glutamine, glutamate, aspartate, asparagine; ammonia assimilation | Glutamine, Glutamate, Aspartate and Asparagine Biosynthesis | Asparagine synthetase [glutamine-hydrolyzing] (EC 6.3.5.4) AsnB     |
| TWK10  | Cofactors, Vitamins, Prosthetic Groups, Pigments   | Riboflavin, FMN, FAD                                              | Riboflavin, FMN and FAD metabolism                          | 5-amino-6-(5-phosphoribosylamino) uracil reductase (EC 1.1.1.193)   |
| TWK10  | Cofactors, Vitamins, Prosthetic Groups, Pigments   | Riboflavin, FMN, FAD                                              | Riboflavin, FMN and FAD metabolism                          | Diaminohydroxyphosphoribosylaminopyrimidine deaminase (EC 3.5.4.26) |
| TWK10  | DNA Metabolism                                     | DNA repair                                                        | DNA repair, bacterial                                       | DNA-cytosine methyltransferase (EC 2.1.1.37)                        |
| TWK10  | DNA Metabolism                                     | DNA repair                                                        | DNA repair, bacterial MutL-MutS system                      | MutS domain protein, family 4                                       |
| TWK10  | DNA Metabolism                                     | DNA uptake, competence                                            | DNA processing cluster                                      | DNA topoisomerase III (EC 5.99.1.2)                                 |
| TWK10  | Phages, Prophages, Transposable elements, Plasmids | Phages, Prophages                                                 | Phage introns                                               | HNH homing endonuclease                                             |
| TWK10  | Phages, Prophages, Transposable elements, Plasmids | Phages, Prophages                                                 | Phage packaging machinery                                   | Phage DNA packaging                                                 |
| TWK10  | Phages, Prophages, Transposable elements, Plasmids | Phages, Prophages                                                 | Phage tail fiber proteins                                   | Phage tail fibers                                                   |
| TWK10  | RNA Metabolism                                     | no subcategory                                                    | Group II intron-associated genes                            | Retron-type RNA-directed DNA polymerase (EC 2.7.7.49)               |
| TWK10  | Stress Response                                    | Osmotic stress                                                    | Choline and Betaine Uptake and Betaine Biosynthesis         | Choline binding protein A                                           |
| WCF S1 | Carbohydrates                                      | Central carbohydrate metabolism                                   | Pentose phosphate pathway                                   | Transketolase, C-terminal section (EC 2.2.1.1)                      |
| WCF S1 | Carbohydrates                                      | Central carbohydrate metabolism                                   | Pentose phosphate pathway                                   | Transketolase, N-terminal section (EC 2.2.1.1)                      |
| WCF S1 | Carbohydrates                                      | Monosaccharides                                                   | Deoxyribose and Deoxynucleoside Catabolism                  | Deoxyribonucleoside regulator DeoR (transcriptional repressor)      |
| WCF S1 | Carbohydrates                                      | Monosaccharides                                                   | Mannose Metabolism                                          | Alpha-1,2-mannosidase                                               |



|        |                                                  |                                            |                                  |                                                                                       |
|--------|--------------------------------------------------|--------------------------------------------|----------------------------------|---------------------------------------------------------------------------------------|
| WCF S1 | Carbohydrates                                    | Monosaccharides                            | Mannose Metabolism               | PTS system, mannose-specific IIB component (EC 2.7.1.69)                              |
| WCF S1 | Carbohydrates                                    | Sugar alcohols                             | Inositol catabolism              | Inosose dehydratase (EC 4.2.1.44)                                                     |
| WCF S1 | Carbohydrates                                    | Sugar alcohols                             | Inositol catabolism              | Major myo-inositol transporter IolT                                                   |
| WCF S1 | Carbohydrates                                    | Sugar alcohols                             | Inositol catabolism              | Myo-inositol 2-dehydrogenase (EC 1.1.1.18)                                            |
| WCF S1 | Carbohydrates                                    | Sugar alcohols                             | Inositol catabolism              | Myo-inositol 2-dehydrogenase 1 (EC 1.1.1.18)                                          |
| WCF S1 | Cell Wall and Capsule                            | Capsular and extracellular polysaccharides | Rhamnose containing glycans      | Alpha-L-Rha alpha-1,3-L-rhamnosyltransferase (EC 2.4.1.-)                             |
| WCF S1 | Cell Wall and Capsule                            | Capsular and extracellular polysaccharides | Rhamnose containing glycans      | Glucose-1-phosphate thymidyltransferase (EC 2.7.7.24)                                 |
| WCF S1 | Cell Wall and Capsule                            | Capsular and extracellular polysaccharides | Rhamnose containing glycans      | dTDP-4-dehydrorhamnose 3,5-epimerase (EC 5.1.3.13)                                    |
| WCF S1 | Cell Wall and Capsule                            | Capsular and extracellular polysaccharides | Rhamnose containing glycans      | dTDP-4-dehydrorhamnose reductase (EC 1.1.1.133)                                       |
| WCF S1 | Cell Wall and Capsule                            | Capsular and extracellular polysaccharides | Sialic Acid Metabolism           | N-acetylneuraminate lyase (EC 4.1.3.3)                                                |
| WCF S1 | Cell Wall and Capsule                            | Capsular and extracellular polysaccharides | Sialic Acid Metabolism           | Predicted sialic acid transporter                                                     |
| WCF S1 | Clustering-based subsystems                      | Cofactors                                  | Riboflavin synthesis cluster     | Inner membrane protein YihY, formerly thought to be RNase BN                          |
| WCF S1 | Cofactors, Vitamins, Prosthetic Groups, Pigments | Coenzyme A                                 | Coenzyme A Biosynthesis          | Aspartate 1-decarboxylase (EC 4.1.1.11)                                               |
| WCF S1 | Cofactors, Vitamins, Prosthetic Groups, Pigments | Folate and pterines                        | Molybdenum cofactor biosynthesis | Molybdenum cofactor biosynthesis protein MoaB                                         |
| WCF S1 | Cofactors, Vitamins, Prosthetic Groups, Pigments | Folate and pterines                        | Molybdenum cofactor biosynthesis | Molybdopterin-guanine dinucleotide biosynthesis protein MobA                          |
| WCF S1 | Cofactors, Vitamins, Prosthetic Groups, Pigments | Folate and pterines                        | Molybdenum cofactor biosynthesis | Molybdopterin-guanine dinucleotide biosynthesis protein MobB                          |
| WCF S1 | Cofactors, Vitamins, Prosthetic Groups, Pigments | Lipoic acid                                | Lipoic acid metabolism           | Protein:protein lipoyl transferase                                                    |
| WCF S1 | DNA Metabolism                                   | no subcategory                             | Restriction-Modification System  | Type I restriction-modification system, DNA-methyltransferase subunit M (EC 2.1.1.72) |
| WCF S1 | DNA Metabolism                                   | no subcategory                             | Restriction-Modification System  | Type I restriction-modification system, restriction subunit R (EC 3.1.21.3)           |



|        |                                      |                      |                                      |                                                                             |
|--------|--------------------------------------|----------------------|--------------------------------------|-----------------------------------------------------------------------------|
| WCF S1 | DNA Metabolism                       | no subcategory       | Restriction-Modification System      | Type I restriction-modification system, specificity subunit S (EC 3.1.21.3) |
| WCF S1 | Fatty Acids, Lipids, and Isoprenoids | Triacylglycerols     | Triacylglycerol metabolism           | Lysophospholipase (EC 3.1.1.5)                                              |
| WCF S1 | Nitrogen Metabolism                  | Denitrification      | Denitrifying reductase gene clusters | Respiratory nitrate reductase alpha chain (EC 1.7.99.4)                     |
| WCF S1 | Nitrogen Metabolism                  | Denitrification      | Denitrifying reductase gene clusters | Respiratory nitrate reductase beta chain (EC 1.7.99.4)                      |
| WCF S1 | Nitrogen Metabolism                  | Denitrification      | Denitrifying reductase gene clusters | Respiratory nitrate reductase delta chain (EC 1.7.99.4)                     |
| WCF S1 | Nitrogen Metabolism                  | Denitrification      | Denitrifying reductase gene clusters | Respiratory nitrate reductase gamma chain (EC 1.7.99.4)                     |
| WCF S1 | Protein Metabolism                   | Protein biosynthesis | Ribosome SSU bacterial               | SSU ribosomal protein S14p (S29e), zinc-dependent                           |
| WCF S1 | Respiration                          | ATP synthases        | F0F1-type ATP synthase               | ATP synthase F0 sector subunit b (EC 3.6.3.14)                              |

Table S5. Bioinformatic analysis of phage sequences in the genome of TWK10.

| Region | Region length (Kb) | Completeness | Total No. of Proteins | Region Position | Most Common Phage (number of gene hit) |
|--------|--------------------|--------------|-----------------------|-----------------|----------------------------------------|
| 1      | 45.1               | intact       | 52                    | 887957–933117   | PHAGE_Oenoco_phiS13_NC_023560 (16)     |
| 2      | 33.7               | intact       | 20                    | 927853–961613   | PHAGE_Enterо_IME_EFm5_NC_028826 (3)    |
| 3      | 16.0               | incomplete   | 12                    | 1498464–1514526 | PHAGE_Staphy_SPbeta_like_NC_029119 (2) |
| 4      | 14.4               | incomplete   | 10                    | 3010218–3024667 | PHAGE_Bacill_PfEFR_5_NC_031055 (1)     |
| 5      | 42.1               | intact       | 55                    | 3161904–3204038 | PHAGE_Lactob_Sha1_NC_019489 (33)       |

Table S6. List of insertion sequences identified in the genome of TWK10.

| IS     | IS family | Function    | Start   | End     |
|--------|-----------|-------------|---------|---------|
| ISP2   | IS1182    | Transposase | 2924424 | 2926217 |
| ISP2   |           |             | 3011639 | 3013431 |
| ISP2   |           |             | 3024616 | 3026410 |
| ISP2   |           |             | 891008  | 892803  |
| ISP2   |           |             | 2452980 | 2454772 |
| ISP2   |           |             | 2576688 | 2578484 |
| ISP2   |           |             | 1952818 | 1954613 |
| ISLsa1 | IS30      | Transposase | 2609205 | 2610237 |
| ISLpl1 | IS30      | Transposase | 1945590 | 1946631 |
| ISLpl1 |           |             | 1835918 | 1836958 |
| ISLpl1 |           |             | 2992253 | 2993294 |

**Table S7.** Hematological parameters of male and female SD rats after oral administration of TWK10 for 28 days.

|                                 | Male            |                                     |                                         |                                       |
|---------------------------------|-----------------|-------------------------------------|-----------------------------------------|---------------------------------------|
|                                 | Control         | Low dose<br>(500 mg TWK10/kg<br>BW) | Medium dose<br>(1000 mg TWK10/kg<br>BW) | High dose<br>(2000 mg TWK10/kg<br>BW) |
| WBC ( $10^3/\mu\text{L}$ )      | 13.2 ± 1.2      | 12.4 ± 1.4                          | 12.0 ± 1.3                              | 12.4 ± 1.5                            |
| RBC ( $10^6/\mu\text{L}$ )      | 9.7 ± 0.7       | 9.5 ± 0.4                           | 9.5 ± 0.8                               | 9.3 ± 0.9                             |
| Hemoglobin (g/dL)               | 18.8 ± 1.6      | 18.5 ± 0.7                          | 18.2 ± 1.4                              | 18.0 ± 1.6                            |
| Hematocrit (%)                  | 54.6 ± 4.2      | 54.0 ± 1.9                          | 52.5 ± 3.7                              | 52.1 ± 4.1                            |
| MCV (fL)                        | 56.5 ± 1.3      | 57.1 ± 1.6                          | 55.4 ± 1.6                              | 56.2 ± 1.2                            |
| MCH (pg)                        | 19.4 ± 0.5      | 19.6 ± 0.5                          | 19.2 ± 0.6                              | 19.4 ± 0.3                            |
| MCHC (g/dL)                     | 34.4 ± 0.5      | 34.3 ± 0.5                          | 34.7 ± 0.4                              | 34.5 ± 0.5                            |
| Platelet ( $10^3/\mu\text{L}$ ) | 1,193.1 ± 108.2 | 1,113.2 ± 91.5                      | 1,132.1 ± 92.9                          | 1,158.9 ± 90.1                        |
| Neutrophil (%)                  | 12.1 ± 1.9      | 11.5 ± 1.8                          | 13.8 ± 3.2                              | 12.0 ± 1.7                            |
| Lymphocyte (%)                  | 82.4 ± 2.3      | 83.9 ± 2.0                          | 80.4 ± 3.7                              | 83.3 ± 1.7                            |
| Monocyte (%)                    | 4.3 ± 0.7       | 3.7 ± 0.8                           | 4.7 ± 1.1                               | 3.7 ± 0.6                             |
| Eosinophil (%)                  | 1.1 ± 0.3       | 0.8 ± 0.3*                          | 0.8 ± 0.4                               | 0.9 ± 0.2                             |
| Basophil (%)                    | 0.2 ± 0.1       | 0.2 ± 0.1                           | 0.3 ± 0.3                               | 0.2 ± 0.1                             |
| PT (sec.)                       | 12.1 ± 1.0      | 12.2 ± 2.5                          | 12.9 ± 1.9                              | 12.3 ± 1.4                            |
|                                 | Female          |                                     |                                         |                                       |
|                                 | Control         | Low dose<br>(500 mg TWK10/kg<br>BW) | Medium dose<br>(1000 mg TWK10/kg<br>BW) | High dose<br>(2000 mg TWK10/kg<br>BW) |
| WBC ( $10^3/\mu\text{L}$ )      | 9.9 ± 1.7       | 11.2 ± 2.4                          | 10.2 ± 2.1                              | 11.8 ± 1.2                            |
| RBC ( $10^6/\mu\text{L}$ )      | 9.4 ± 0.4       | 9.3 ± 0.4                           | 9.3 ± 0.4                               | 9.4 ± 0.2                             |
| Hemoglobin (g/dL)               | 17.8 ± 0.7      | 17.4 ± 0.9                          | 17.7 ± 0.6                              | 18.2 ± 0.6                            |
| Hematocrit (%)                  | 51.4 ± 2.5      | 50.0 ± 2.0                          | 49.9 ± 1.9                              | 52.2 ± 1.9                            |
| MCV (fL)                        | 53.2 ± 1.4      | 53.8 ± 1.3                          | 52.9 ± 1.5                              | 54.6 ± 1.4                            |
| MCH (pg)                        | 18.8 ± 0.5      | 18.7 ± 0.7                          | 18.8 ± 0.7                              | 19.2 ± 0.5                            |
| MCHC (g/dL)                     | 35.2 ± 1.4      | 34.7 ± 0.7                          | 35.5 ± 0.4                              | 35.2 ± 0.6                            |
| Platelet ( $10^3/\mu\text{L}$ ) | 1,209.0 ± 94.9  | 1,155.7 ± 114.1                     | 1,214.1 ± 175.1                         | 1,093.8 ± 140.9                       |
| Neutrophil (%)                  | 13.8 ± 4.0      | 10.8 ± 2.4                          | 10.2 ± 3.5                              | 12.0 ± 3.0                            |
| Lymphocyte (%)                  | 80.9 ± 4.0      | 84.7 ± 2.8                          | 85.7 ± 4.4                              | 84.1 ± 3.5                            |
| Monocyte (%)                    | 4.4 ± 0.8       | 3.5 ± 0.8                           | 3.0 ± 1.1*                              | 2.8 ± 0.6*                            |
| Eosinophil (%)                  | 0.7 ± 0.2       | 0.8 ± 0.2                           | 0.9 ± 0.3                               | 0.8 ± 0.4                             |
| Basophil (%)                    | 0.2 ± 0.1       | 0.2 ± 0.1                           | 0.2 ± 0.1                               | 0.2 ± 0.1                             |
| PT (sec.)                       | 9.8 ± 0.4       | 11.0 ± 2.8                          | 11.8 ± 6.1                              | 9.7 ± 0.2                             |

Data are expressed as mean ± SD,  $n = 10$ . Statistical significances between the values of each group and negative control were analyzed by one-way ANOVA with a post-hoc Tukey test. Results of non-parametric data, including hematocrit, neutrophil, lymphocyte, monocyte, eosinophil and basophil were analyzed by Kruskal-Wallis with a post-hoc Dunn's test. The mark (\*) indicates significant difference compared with control group ( $P < 0.05$ ). WBC, white blood cell count; RBC, red blood cell count; MCV, mean corpuscular volume; MCH, mean corpuscular hematocrit; MCHC, mean corpuscular hemoglobin concentration; PT, prothrombin time.

**Table S8.** Serum biochemical parameters of male and female SD rats after oral administration of TWK10 for 28 days.

| Male                    |              |                                     |                                         |                                       |
|-------------------------|--------------|-------------------------------------|-----------------------------------------|---------------------------------------|
|                         | Control      | Low dose<br>(500 mg TWK10/kg<br>BW) | Medium dose<br>(1000 mg TWK10/kg<br>BW) | High dose<br>(2000 mg TWK10/kg<br>BW) |
| Glucose (mg /dL)        | 161.3 ± 57.0 | 165.7 ± 81.1                        | 157.4 ± 53.1                            | 144.1 ± 40.2                          |
| BUN (mg/dL)             | 15.8 ± 1.2   | 14.9 ± 1.4                          | 14.6 ± 1.5                              | 15.7 ± 1.1                            |
| Creatinine (mg/dL)      | 0.41 ± 0.03  | 0.41 ± 0.06                         | 0.34 ± 0.05*                            | 0.35 ± 0.05*                          |
| AST (U/L)               | 109.8 ± 17.0 | 132.8 ± 86.4                        | 111.2 ± 29.5                            | 115.9 ± 27.7                          |
| ALT (U/L)               | 28.9 ± 5.0   | 33.3 ± 19.0                         | 28.0 ± 9.8                              | 27.1 ± 5.7                            |
| Total protein (g/dL)    | 6.6 ± 0.3    | 6.5 ± 0.2                           | 6.4 ± 0.3                               | 6.5 ± 0.2                             |
| Albumin (g/dL)          | 4.6 ± 0.2    | 4.5 ± 0.2                           | 4.4 ± 0.2*                              | 4.6 ± 0.2                             |
| ALP (U/L)               | 172.5 ± 35.2 | 172.7 ± 25.8                        | 172.1 ± 39.1                            | 167.5 ± 28.9                          |
| γ-GT (U/L) <sup>a</sup> | < 2.0        | < 2.0                               | < 2.0                                   | < 2.0                                 |
| Cholesterol (mg/dL)     | 68.3 ± 13.7  | 66.2 ± 11.6                         | 68.3 ± 7.0                              | 66.7 ± 8.1                            |
| Triglyceride (mg/dL)    | 59.9 ± 18.8  | 61.8 ± 31.4                         | 58.7 ± 25.1                             | 42.5 ± 10.9                           |
| Calcium (mg/dL)         | 12.2 ± 0.4   | 12.3 ± 0.7                          | 12.1 ± 0.7                              | 12.0 ± 0.3                            |
| Phosphorus (mg/dL)      | 15.2 ± 0.8   | 15.2 ± 1.5                          | 14.8 ± 1.2                              | 15.2 ± 0.9                            |
| Sodium (meg/L)          | 146.2 ± 1.8  | 146.7 ± 1.8                         | 147.0 ± 1.8                             | 147.3 ± 2.1                           |
| Potassium (meg/L)       | 8.8 ± 1.0    | 8.6 ± 1.2                           | 8.0 ± 1.0                               | 8.6 ± 0.8                             |
| Chloride (meg/L)        | 102.4 ± 2.1  | 102.8 ± 1.9                         | 103.0 ± 1.6                             | 104.4 ± 1.5                           |
| Globulin (g/dL)         | 2.0 ± 0.1    | 2.0 ± 0.1                           | 2.0 ± 0.3                               | 1.9 ± 0.1                             |
| Total bilirubin (mg/dL) | < 0.04       | < 0.04                              | < 0.04                                  | < 0.04                                |
| Female                  |              |                                     |                                         |                                       |
|                         | Control      | Low dose<br>(500 mg TWK10/kg<br>BW) | Medium dose<br>(1000 mg TWK10/kg<br>BW) | High dose<br>(2000 mg TWK10/kg<br>BW) |
| Glucose (mg /dL)        | 116.3 ± 45.4 | 97.0 ± 13.8                         | 127.3 ± 33.0                            | 143.8 ± 45.0                          |
| BUN (mg/dL)             | 17.0 ± 2.3   | 16.0 ± 1.1                          | 15.5 ± 1.7                              | 16.7 ± 1.8                            |
| Creatinine (mg/dL)      | 0.47 ± 0.11  | 0.37 ± 0.08                         | 0.33 ± 0.05*                            | 0.39 ± 0.03*                          |
| AST (U/L)               | 107.8 ± 19.7 | 104.4 ± 16.1                        | 92.6 ± 21.1                             | 94.7 ± 14.4                           |
| ALT (U/L)               | 27.7 ± 3.7   | 26.1 ± 4.6                          | 24.9 ± 5.2                              | 22.2 ± 4.3*                           |
| Total protein (g/dL)    | 7.0 ± 0.3    | 6.8 ± 0.4                           | 6.6 ± 0.5                               | 6.7 ± 0.4                             |
| Albumin (m/dL)          | 5.2 ± 0.3    | 4.9 ± 0.3                           | 4.9 ± 0.5                               | 5.0 ± 0.4                             |
| ALP (U/L)               | 84.8 ± 15.5  | 88.0 ± 28.6                         | 85.0 ± 14.8                             | 91.1 ± 15.8                           |
| γ-GT (U/L) <sup>a</sup> | < 2.0        | < 2.0                               | < 2.0                                   | < 2.0                                 |
| Cholesterol (mg/dL)     | 79.4 ± 14.4  | 79.7 ± 13.5                         | 78.0 ± 13.6                             | 84.9 ± 10.5                           |
| Triglyceride (mg/dL)    | 46.0 ± 20.5  | 34.3 ± 16.0                         | 39.3 ± 20.8                             | 36.2 ± 21.7                           |
| Calcium (mg/dL)         | 11.4 ± 0.5   | 11.8 ± 0.5                          | 11.7 ± 0.6                              | 11.8 ± 0.5                            |
| Phosphorus (mg/dL)      | 12.3 ± 0.5   | 11.7 ± 0.9                          | 11.7 ± 1.1                              | 11.8 ± 0.9                            |
| Sodium (meg/L)          | 144.8 ± 2.6  | 143.4 ± 2.1                         | 142.9 ± 3.2                             | 144.3 ± 1.2                           |
| Potassium (meg/L)       | 11.4 ± 1.5   | 11.2 ± 1.6                          | 11.4 ± 1.7                              | 10.4 ± 1.2                            |
| Chloride (meg/L)        | 99.5 ± 2.1   | 99.2 ± 1.4                          | 99.5 ± 1.4                              | 100.4 ± 2.2                           |
| Globulin (g/dL)         | 1.8 ± 0.1    | 1.9 ± 0.1                           | 1.7 ± 0.1                               | 1.7 ± 0.1                             |
| Total bilirubin (mg/dL) | < 0.04       | < 0.04                              | < 0.04                                  | < 0.04                                |

Data are expressed as mean ± SD, *n* = 10. Statistical significances between the values of each group and negative control were analyzed by one-way ANOVA with a post-hoc Tukey test. The mark (\*) indicates significant difference compared with control group (*P* < 0.05). <sup>a</sup> γ-GT, total bilirubin shown as lower the detection limit. BUN, blood urea nitrogen; AST, aspartate aminotransferase; ALT, alanine aminotransferase; ALP, alkaline phosphatase.
